# Supplementary material for: Network Reconstruction Using Nonparametric Additive ODE Models
Source: PubMed Central journal article supplement (PMC3986056; doi:10.1371/journal.pone.0094003), 2014-04-14
Supplement: pone.0094003.s002.pdf [file pone.0094003.s002.pdf]

---

**Algorithm S2** Sparse Backfitting

---

```
1: for  $i = 1 : d$  do
2:   input Concatenated derivative estimates:  $\hat{\mathbf{x}}_i = (\hat{x}_i^1(t_1), \dots, \hat{x}_i^R(t_n))'$ .
3:   input Concatenated trajectory estimates:  $\hat{\mathbf{x}}_j = (\hat{x}_j^1(t_1), \dots, \hat{x}_j^R(t_n))'$ ,
4:      $j = 1, \dots, d$ .
5:   input Smoothing parameter  $\lambda_{1i}$  and sparsity parameter  $\lambda_{2i}$ .
6:   initialize  $\mathbf{f}_{ij} \leftarrow 0 \in \mathbb{R}^N$ , for  $j = 1, \dots, d$ , where  $N = nR$ .
7:   compute  $\hat{\alpha}_i \leftarrow N^{-1} \sum_{k=1}^N \hat{\mathbf{x}}_{ik}$ .
8:   repeat
9:     Store starting values  $\mathbf{f}_i^* \leftarrow \mathbf{f}_i$ .
10:    for  $j = 1 : d$  do
11:      Compute residuals  $\mathbf{r} \leftarrow \hat{\mathbf{x}}_i - \hat{\alpha}_i - \sum_{\ell \neq j} \mathbf{f}_{i\ell}(\hat{\mathbf{x}}_\ell)$ 
12:      Smooth  $\mathbf{f}_{ij} \leftarrow S_j(\lambda_{1i})\mathbf{r}$ 
13:      Estimate Norm  $s^2 \leftarrow \left( N^{-1} \sum_{k=1}^N \mathbf{f}_{ijk}^2 \right)^{\frac{1}{2}}$ 
14:      Soft Threshold  $\mathbf{f}_{ij} \leftarrow (1 - \lambda_{2i}/s^2)_+ \mathbf{f}_{ij}$ 
15:      Center  $\mathbf{f}_{ij} \leftarrow \mathbf{f}_{ij} - \bar{\mathbf{f}}_{ij}$ 
16:    end for
17:  until Convergence  $\sup_{j=1, \dots, d} \sup_{k=1, \dots, N} |\mathbf{f}_{ijk} - \mathbf{f}_{ijk}^*| < \epsilon$ .
18: end for
```

---
